# Supplementary material
Source: PubMed Central journal article supplement (PMC1257690)
Supplement: pnas_0409558102_1.pdf [file pnas_0409558102_1.pdf]

**A**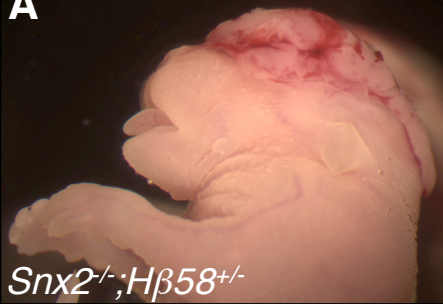*Snx2<sup>-/-</sup>;Hβ58<sup>+/-</sup>***B**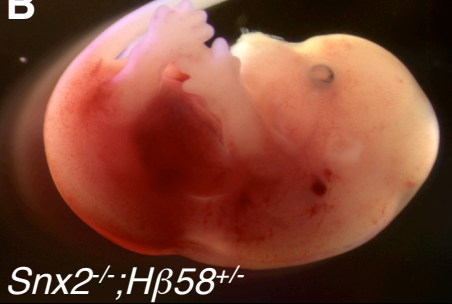*Snx2<sup>-/-</sup>;Hβ58<sup>+/-</sup>***C**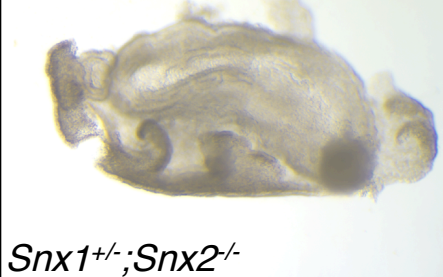*Snx1<sup>+/-</sup>;Snx2<sup>-/-</sup>***D**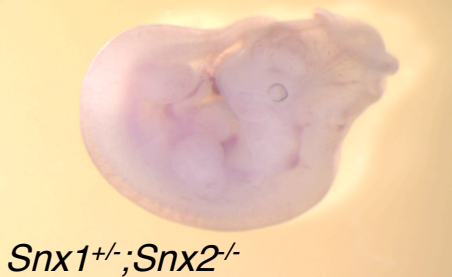*Snx1<sup>+/-</sup>;Snx2<sup>-/-</sup>***E**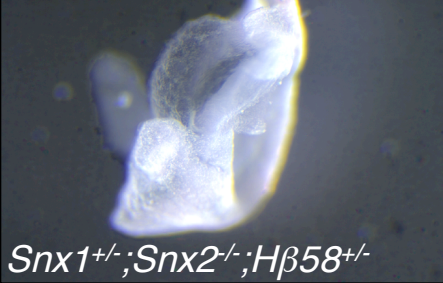*Snx1<sup>+/-</sup>;Snx2<sup>-/-</sup>;Hβ58<sup>+/-</sup>***F**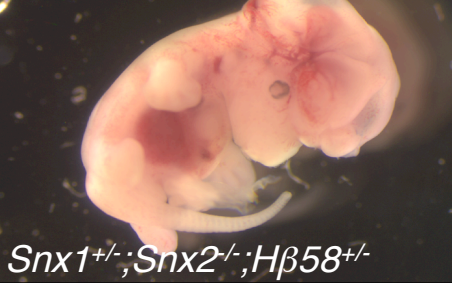*Snx1<sup>+/-</sup>;Snx2<sup>-/-</sup>;Hβ58<sup>+/-</sup>*
