# Supplementary material
Source: PubMed Central journal article supplement (PMC1257690)

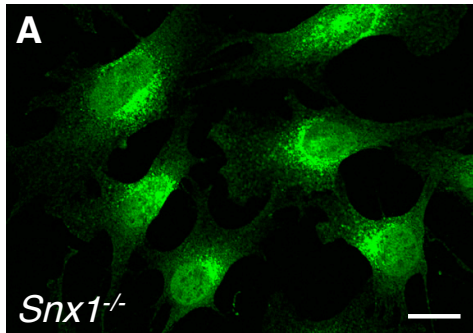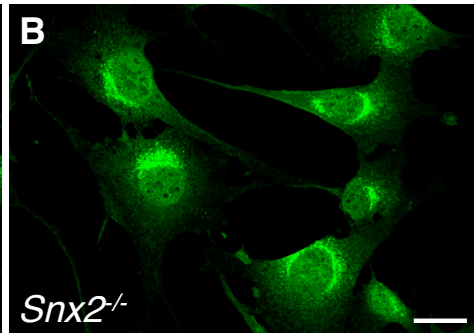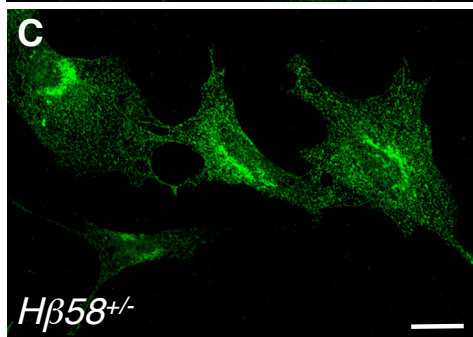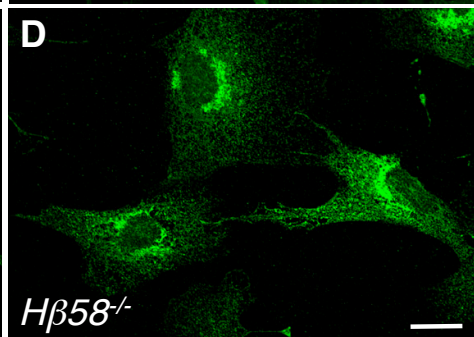

Supplement: pnas_0409558102_2.pdf [file pnas_0409558102_2.pdf]

*Hβ58<sup>+/+</sup>*   *Hβ58<sup>+/-</sup>*   *Hβ58<sup>-/-</sup>*

IB: anti-  
mVPS35

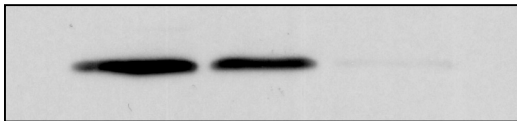

mVPS35

IB: anti-  
actin

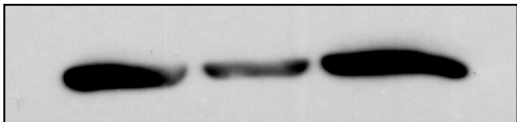

actin

Supplement: pnas_0409558102_3.pdf [file pnas_0409558102_3.pdf]
